# Supplementary figures and images for: Improving heavy oil recovery, part (I): synthesis and surface activity evaluation of some novel organometallic surfactants based on salen–M complexes
Source: Royal Society of Chemistry journal article supplement (doi:10.1039/d0ra09502h), 2021-01-01

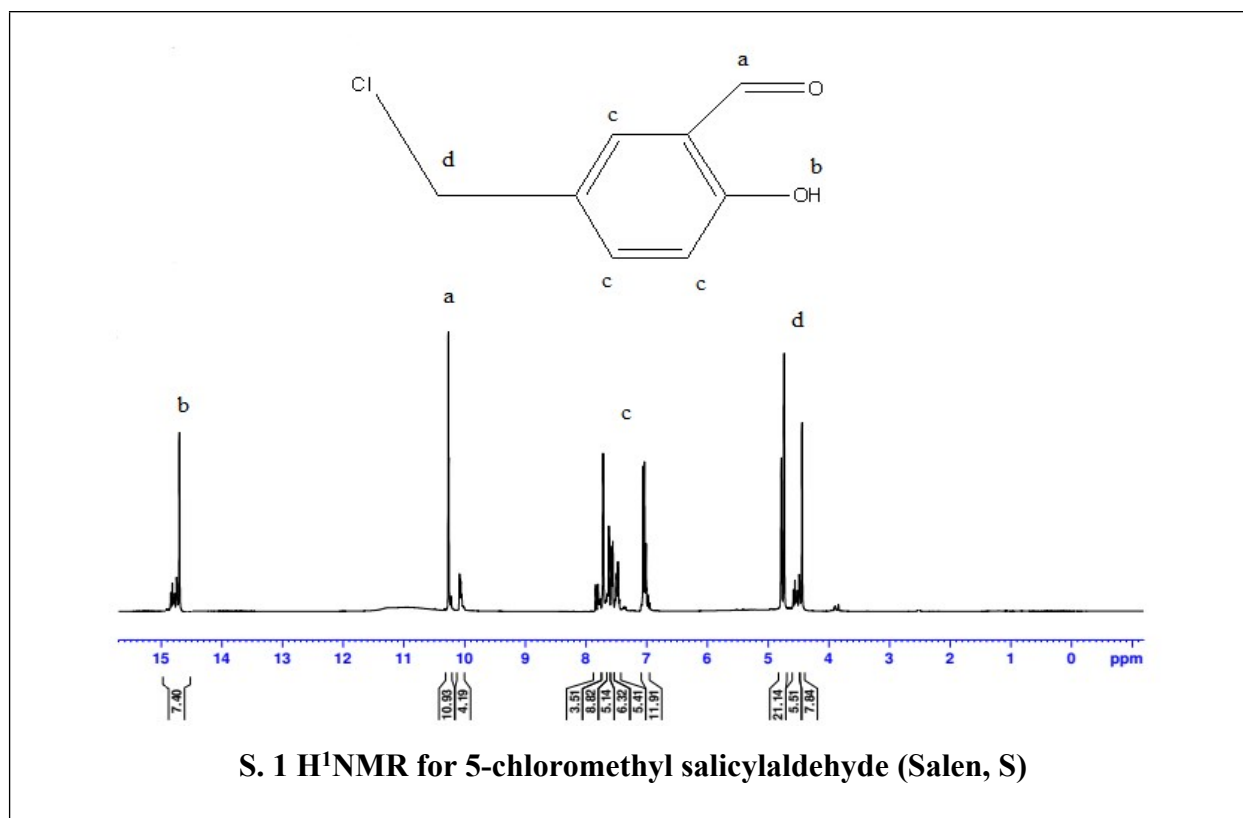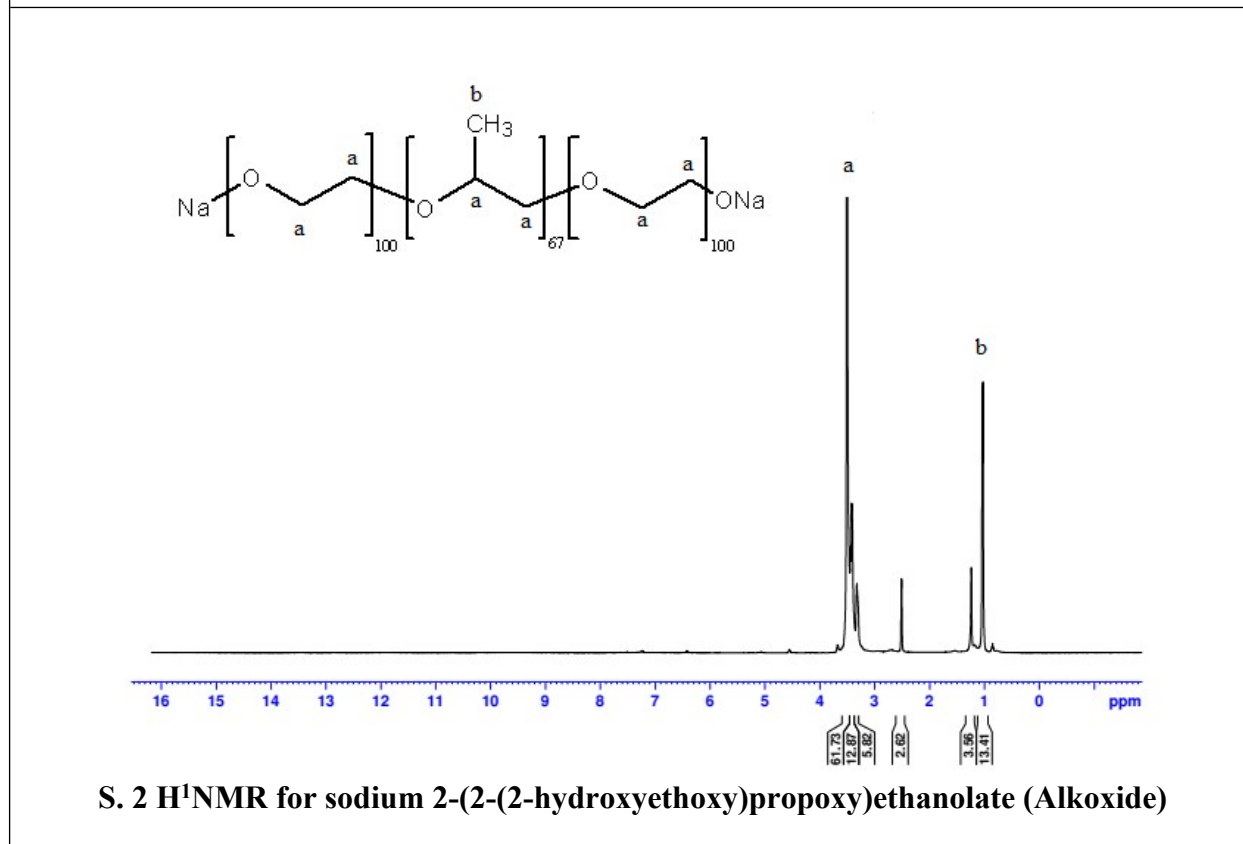

Supplement: d0ra09502h1.pdf [file d0ra09502h1.pdf]
